# Supplementary material
Source: Springer Nature journal article supplement (https://www.springermedizin.de/resource/supplementary/12943_2007_279_MOESM2_ESM.pdf/9553842)

**A****Wnt3a-induced ALP activity**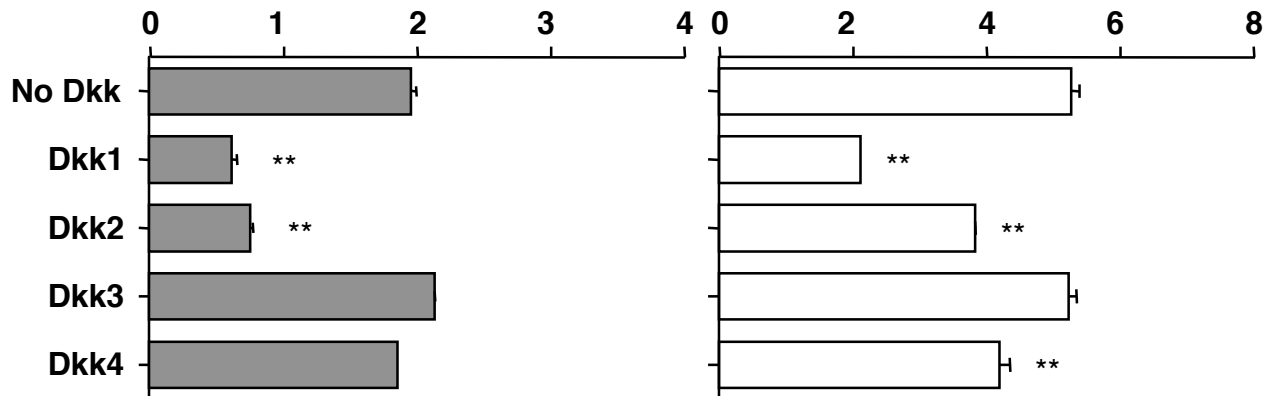**B****Wnt3a-induced ALP mRNA**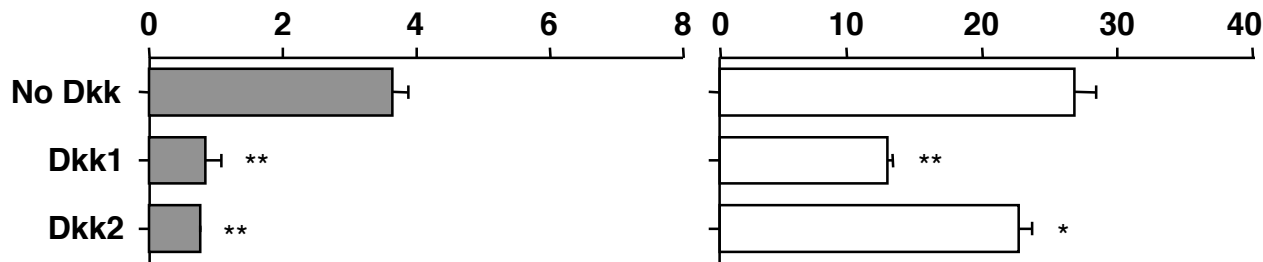**C****Wnt3a-induced OCN mRNA**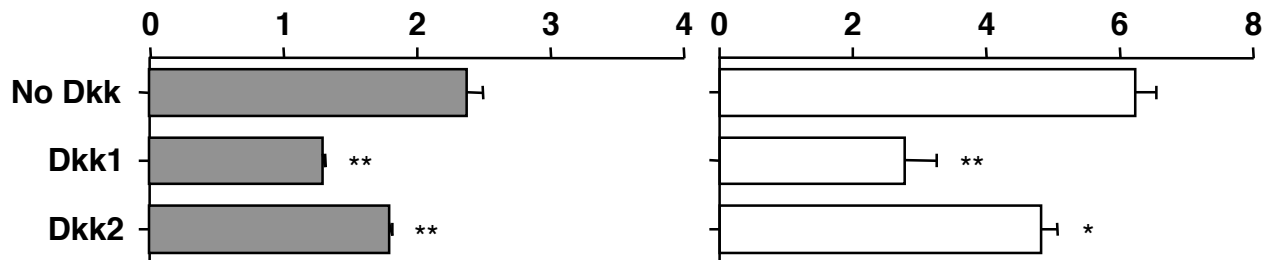

Supplement: MOESM2 [file 9553842]
